# Supplementary material for: Scalable self-supported FeNi3/Mo2C flexible paper for enhanced electromagnetic wave absorption evaluated via coaxial, waveguide and arch methods
Source: Royal Society of Chemistry journal article supplement (doi:10.1039/d0tc01881c), 2020-01-01
Supplement: d0tc01881c1.pdf [file d0tc01881c1.pdf]

## Supporting Information

### Scalable and self-supported FeNi<sub>3</sub>/Mo<sub>2</sub>C flexible paper for enhanced electromagnetic wave absorption evaluated via coaxial, waveguide and arch methods

Chen Wu<sup>1\*</sup>, Kai Bi<sup>1</sup> and Mi Yan<sup>1\*</sup>

*<sup>1</sup> School of Materials Science and Engineering, State Key Laboratory of Silicon Materials, Zhejiang University, Hangzhou 310027, China*

*\*E-mail: chen\_wu@zju.edu.cn; mse\_yanmi@zju.edu.cn*

Figure S1 shows the photo images taken from the testing samples for the coaxial, waveguide and arch. The coaxial sample exhibit a ring shape with outer diameter = 7.00 mm, inner diameter = 3.04 mm and thickness = 2.00 mm, while dimensions for the samples prepared for waveguide and arch measurements are 22.86 mm × 10.16 mm × 2.00 mm and 100.00 mm × 100.00 mm × 2.00 mm, respectively.

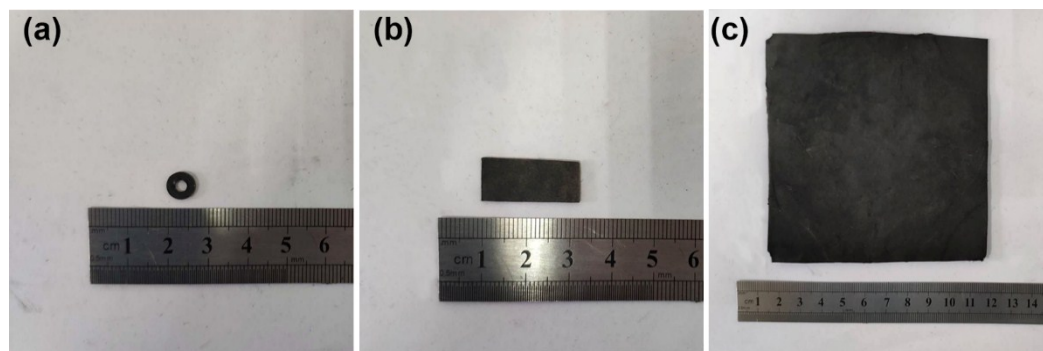

**Fig S1** Photo taken from the testing samples prepared for the (a) coaxial, (b) waveguide and (c) arch

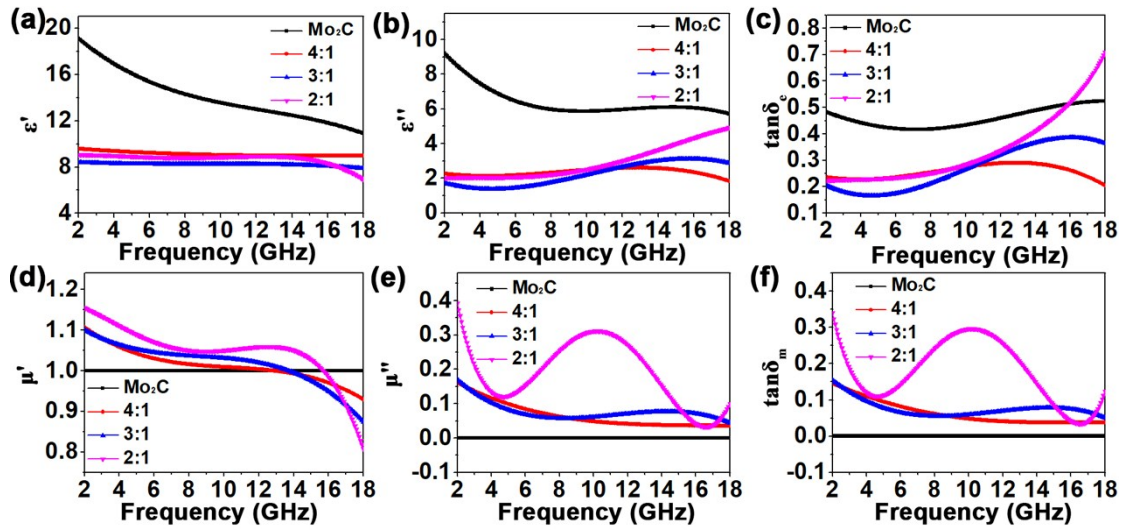

**Fig. S2** (a) Real ( $\epsilon'$ ) and (b) imaginary ( $\epsilon''$ ) part of the permittivity and (c) the corresponding

dielectric loss tangent. (d) Real ( $\mu'$ ) and (e) imaginary ( $\mu''$ ) permeability and (f) the magnetic loss

tangent for the FeNi<sub>3</sub>/Mo<sub>2</sub>C papers with varied FeNi<sub>3</sub>/Mo<sub>2</sub>C ratio

Figure S3a-S3d show the Reflection loss (RL) of FeNi<sub>3</sub>/Mo<sub>2</sub>C papers with different FeNi<sub>3</sub>/Mo<sub>2</sub>C ratio.

The absorbing performance of the Mo<sub>2</sub>C paper is the worst with the minimum RL of around -18.30

dB. Increased of FeNi<sub>3</sub> ratio gives rise to improved absorbing performance. When Mo<sub>2</sub>C:FeNi<sub>3</sub> = 3:1,

optimized absorption of RL = -51.50 dB and EAB = 5.1 GHz at the thickness of 2.0 mm is obtained

as shown in Figure S3c. Further decreasing the Mo<sub>2</sub>C:FeNi<sub>3</sub> ratio to 2:1 leads to deteriorated absorption

1 of RL = -39.85 dB at the thickness of 3.5 mm.

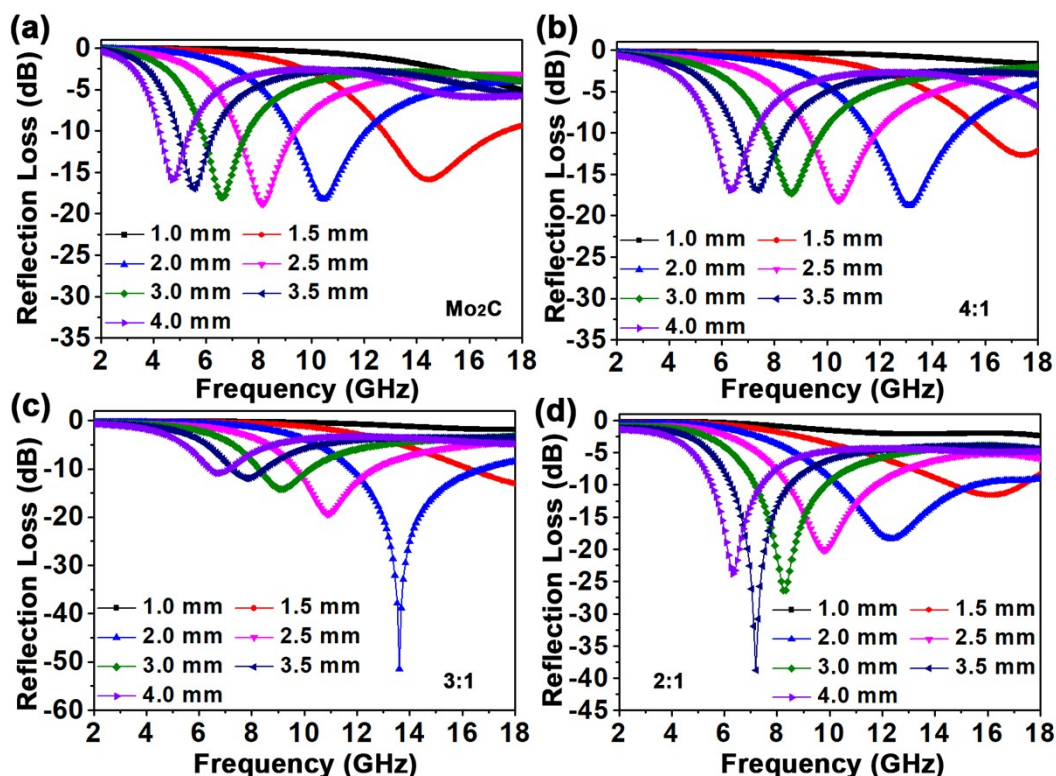

**Fig.S3** RL as a function of frequency for the flexible papers containing (a) the Mo<sub>2</sub>C and the composites with the Mo<sub>2</sub>C/FeNi<sub>3</sub> molar ratio of (b) 4:1, (c) 3:1 and (d) 2:1

2  
3  
4  
5  
6 To understand the reaction process during the co-precipitation of Fe<sup>2+</sup> and Ni<sup>2+</sup>, effects of the Fe<sup>2+</sup>  
7 concentration, reaction time and temperature have been investigated. Fig.S4a compares the XRD of  
8 the resultants obtained by varying the Fe<sup>2+</sup> molar concentration from 0% to 10% and 25% with enlarged  
9 area indicated by the dashed rectangle shown in Fig.S4b where no Fe-related peak is observed and the  
10 (001) peak of Ni(OH)<sub>2</sub> shifts from 22.40° to 22.74° and 22.81° with raised Fe concentration, indicating  
11 incorporation of the Fe in the Ni(OH)<sub>2</sub>. Fig.S4c and S4e illustrate the changes of the XRD curves for  
12 the resultants obtained with increased reaction time and temperature from 10 min to 120 min and from  
13 40 °C to 80 °C with the corresponding enlargements shown in Fig. S4d and S4f. With the reaction  
14 proceeds, the area ratio of FeNi<sub>3</sub> increases from 22.6% to 78.7% for increased reaction temperature

1 (Fig. S4d) and from 41.9 % to 76.3 % with extended reaction time (Fig. S4f), suggesting the transition  
 2 from the Fe-incorporated  $\text{Ni}(\text{OH})_2$  into the  $\text{FeNi}_3$  during the reaction.

3

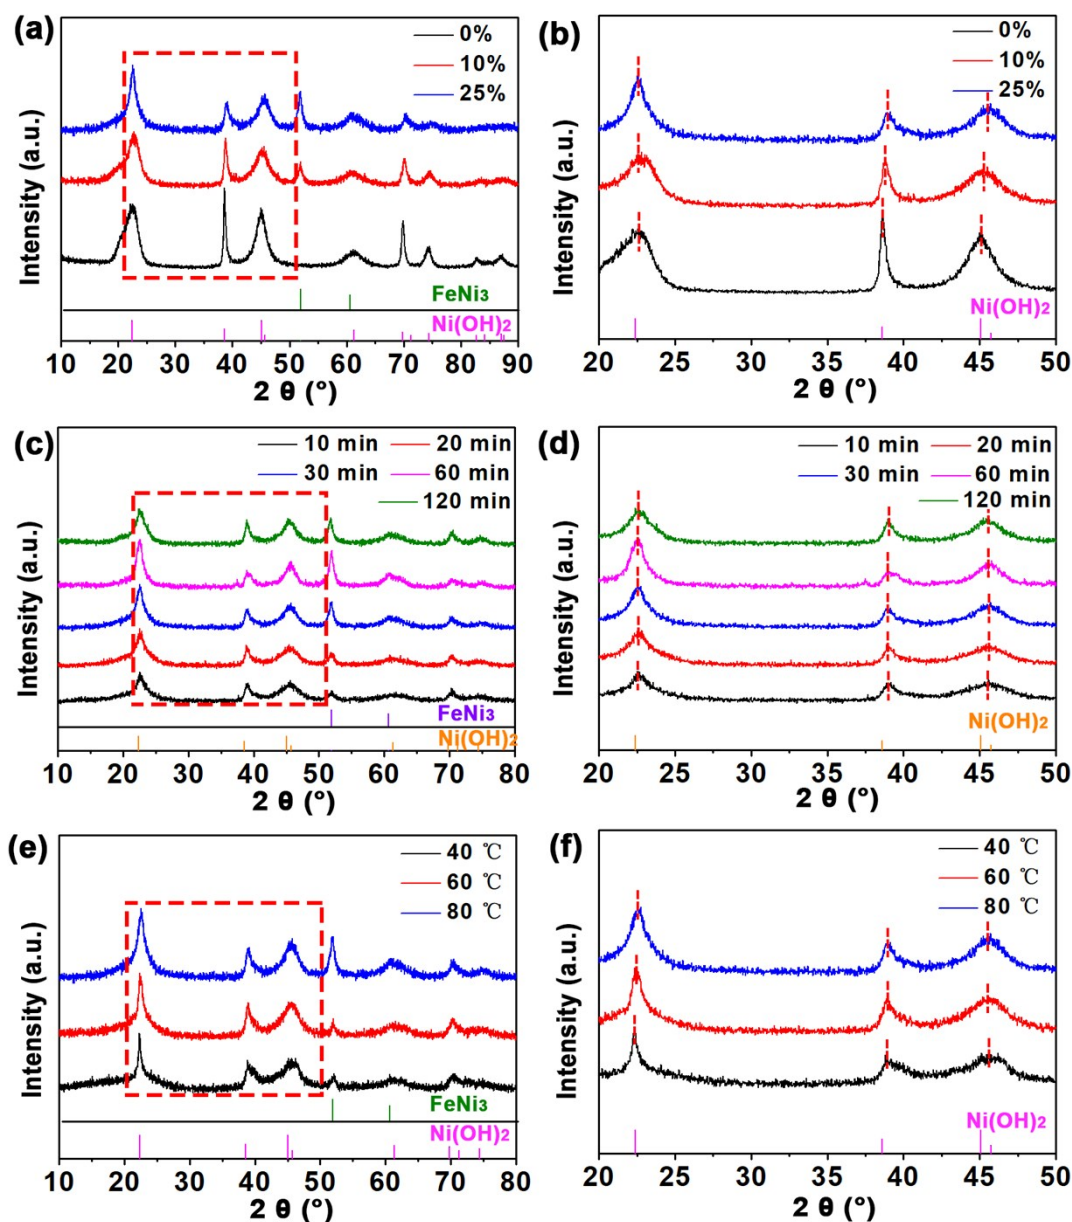

4

5 **Fig. S4** XRD patterns taken from the resultants from the co-precipitation of  $\text{Fe}^{2+}$  and  $\text{Ni}^{2+}$ , showing  
 6 their evolution with varied  $\text{Fe}^{2+}$  concentration, reaction time and temperature.

7

8 As shown in Fig. S5, when the content of  $\text{FeNi}_3/\text{Mo}_2\text{C}$  in the paper increases from 20 wt%, 30 wt% to

1 40 wt%, the  $\varepsilon'$  increases from around 6 to 16, and the  $\varepsilon''$  increases from approx 1 to 6 with the  $\tan\delta_e$   
 2 exhibiting similar trend. For permeability, the raised FeNi<sub>3</sub>/Mo<sub>2</sub>C content gives rise to slightly  
 3 increased  $\mu'$  and  $\mu''$ . Similar trend is observed for the  $\tan\delta_m$  with the appearance of resonance peaks as  
 4 shown in Figure S5f.

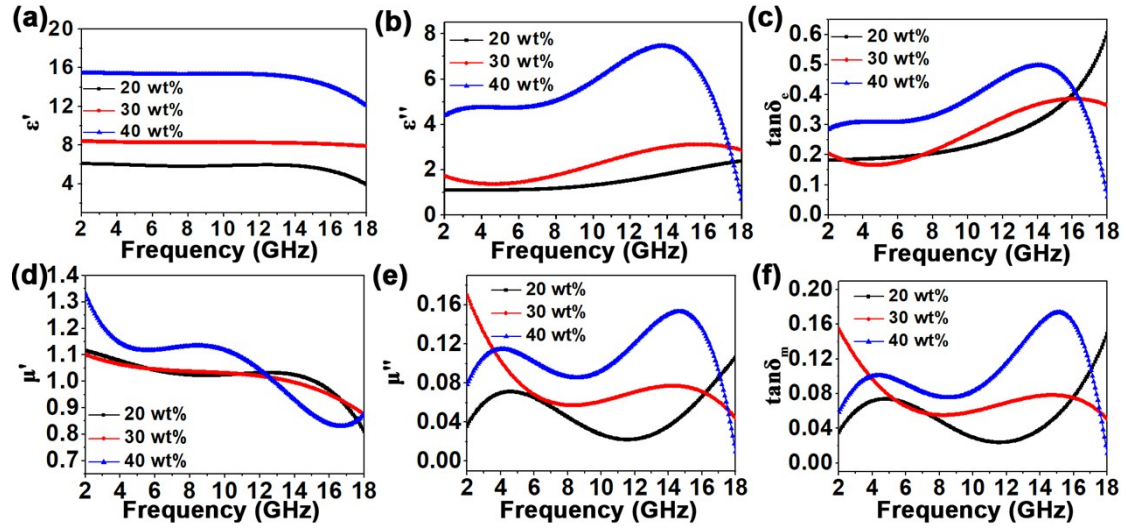

5  
 6 **Fig. S5** Changes of the electromagnetic parameters for the flexible papers containing as the varied  
 7 FeNi<sub>3</sub>/Mo<sub>2</sub>C contents, including the (a)  $\varepsilon'$ , (b)  $\varepsilon''$ , (c)  $\tan\delta_e$ , (d)  $\mu'$ , (e)  $\mu''$  and (f)  $\tan\delta_m$

8  
 9 Figure S6 shows the reflection loss curves of the flexible papers containing varied FeNi<sub>3</sub>/Mo<sub>2</sub>C  
 10 content. The sample containing 20 wt% FeNi<sub>3</sub>/Mo<sub>2</sub>C exhibits relatively poor performance with the  
 11 minimum RL of -18.8 dB. Increasing FeNi<sub>3</sub>/Mo<sub>2</sub>C content to 30 wt%, better absorption with RL = -  
 12 51.50 dB and EAB = 5.1 GHz at the thickness of 2.0 mm has been achieved which deteriorated with  
 13 further increased FeNi<sub>3</sub>/Mo<sub>2</sub>C content of 40 wt%.



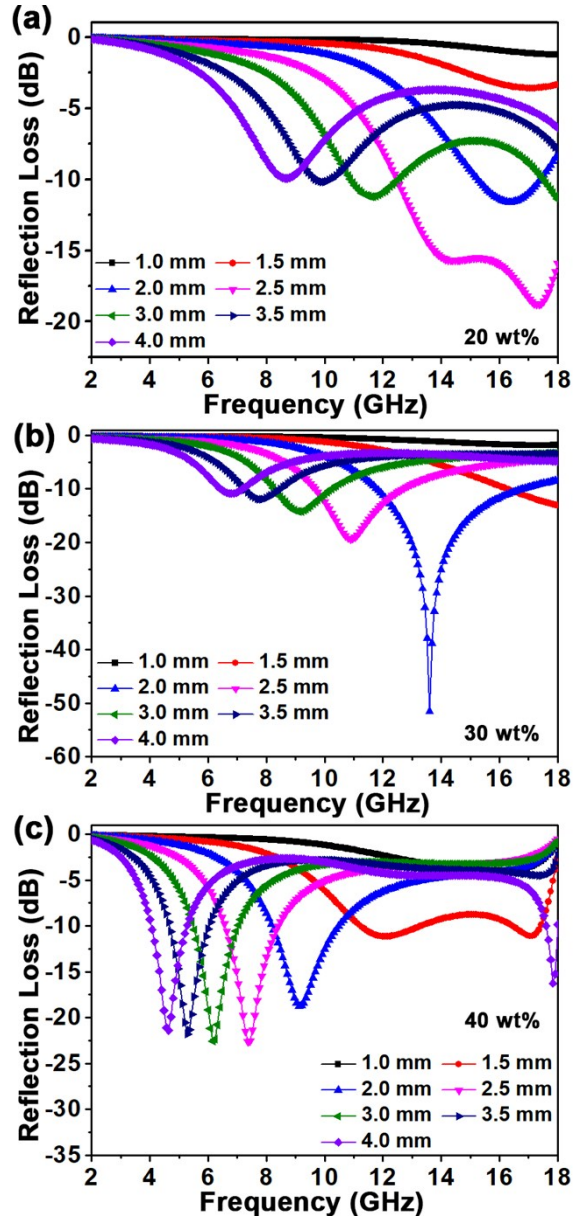

**Fig. S6** Reflection loss (RL) as a function of frequency for the samples with varied FeNi<sub>3</sub>/Mo<sub>2</sub>C content of (a) 20 wt%, (b) 30 wt% and (c) 40 wt%

Figure S7 illustrates that besides strong attenuation of the EM wave, impedance matching also needs to be considered. Although the paper containing 40 wt% FeNi<sub>3</sub>/Mo<sub>2</sub>C exhibit the highest dielectric and magnetic loss as shown in Fig. S5c and S5f, enhanced RL is achieved for the sample with 30 wt% FeNi<sub>3</sub>/Mo<sub>2</sub>C, which can be attributed to better impedance matching.

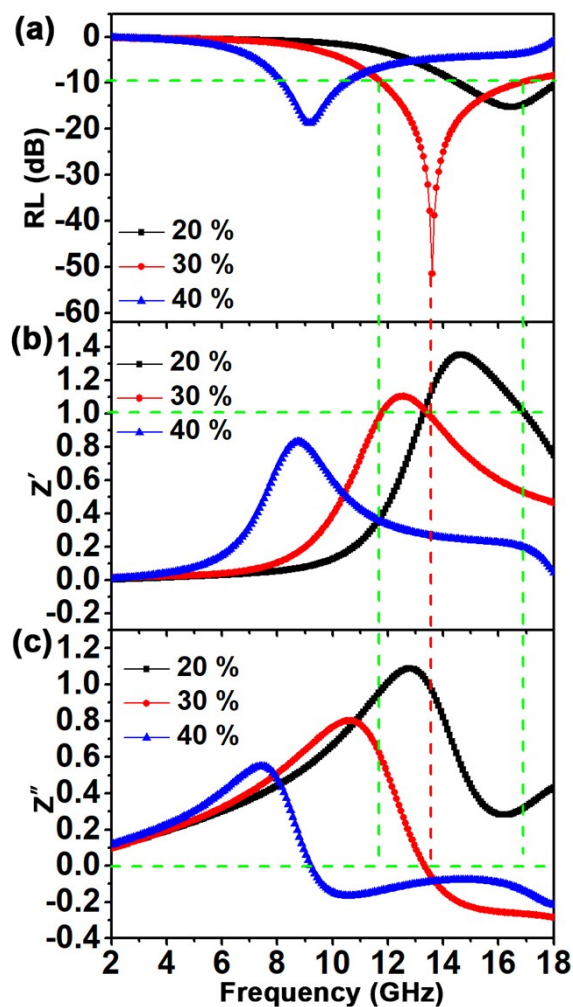

**Fig.S7** Comparisons of the (a) RL, (b) real and (c) imaginary part of the impedance between the flexible papers with different content of FeNi<sub>3</sub>/Mo<sub>2</sub>C

Figure S8a-S8d show the complex permittivity and permeability of the blank flexible paper and that loaded with the FeNi<sub>3</sub> nanoparticles. Both enhanced dielectric and magnetic parameters can be achieved by the addition of the FeNi<sub>3</sub>. Compared with the blank paper, the FeNi<sub>3</sub> paper exhibit slightly improved RL of 15.38 dB, EAB of 4.7 GHz at the thickness of 3.0mm(Fig. S8e and S8f). Such performance however, is much inferior to that of the FeNi<sub>3</sub>/Mo<sub>2</sub>C papers.

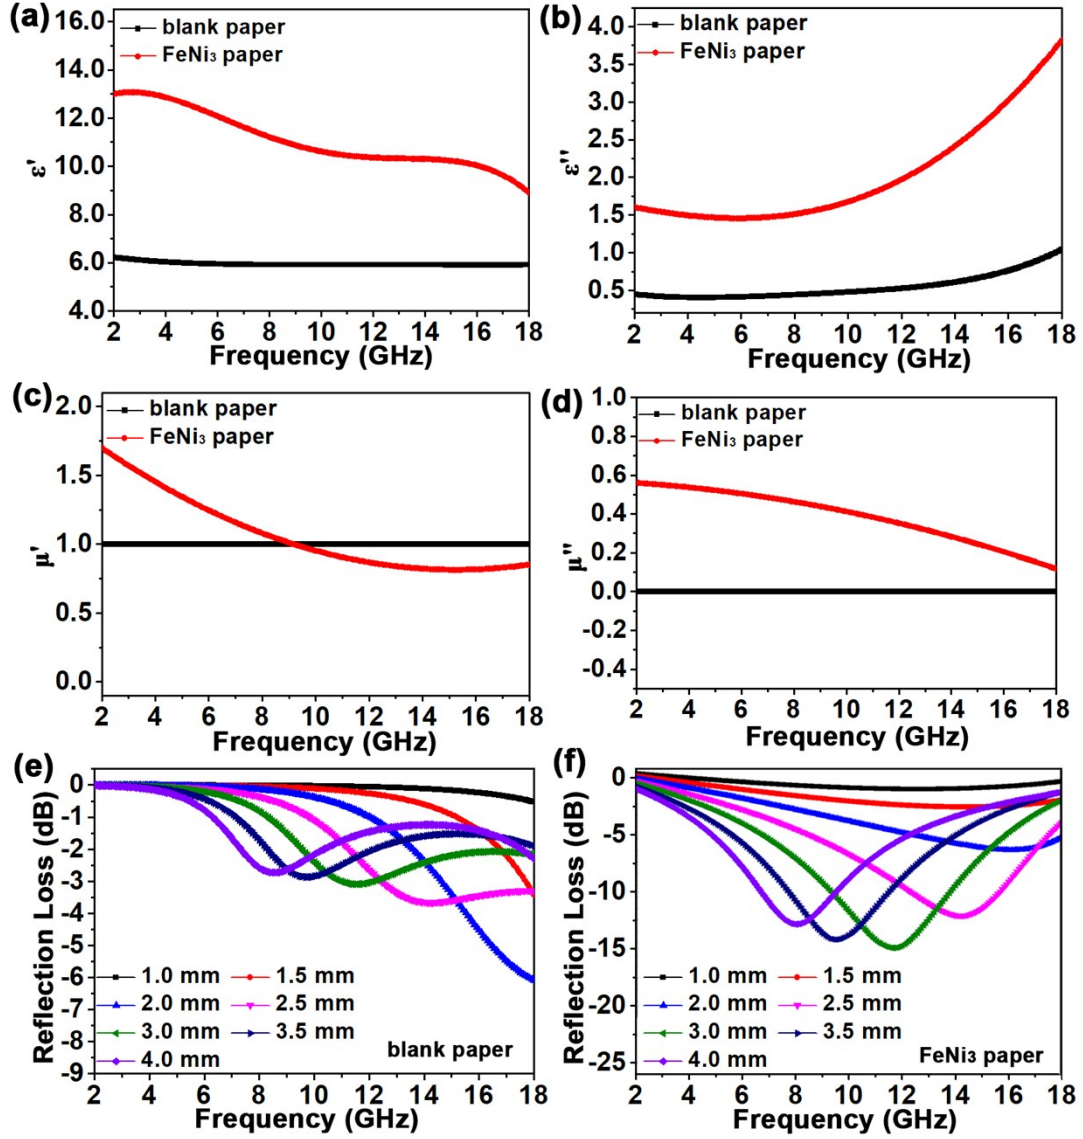

**Fig. S8** (a) Real ( $\epsilon'$ ) and (b) imaginary ( $\epsilon''$ ) part of the permittivity as well as (c) the real ( $\mu'$ ) and (e) imaginary ( $\mu''$ ) permeability of the blank paper and that containing the FeNi<sub>3</sub>. (e) & (f) Reflection loss (RL) calculated for the two samples.

Figure S9 shows the cole-cole curves of the composite absorbing papers before and after annealing.

According to the Debye theory, relationship between the  $\epsilon'$  and  $\epsilon''$  can be expressed by<sup>1</sup>:

$$\left( \epsilon' - \frac{\epsilon_s + \epsilon_\infty}{2} \right)^2 + (\epsilon'')^2 = \left( \frac{\epsilon_s - \epsilon_\infty}{2} \right)^2 \quad (1)$$

Where  $\epsilon_s$  is the static dielectric constant and  $\epsilon_\infty$  is the relative dielectric constant at high frequencies.



1 Consequently, the appearance of semicircles in the cole-cole curves can be correlated to Debye  
 2 relaxation processes. Compared with the samples without annealing or annealed at relative low  
 3 temperature (350 °C), obvious semicircles can be observed for the composites after annealing at  
 4 temperatures above 500 °C (Fig. S9c and S9d). Such relaxation is related to the interface polarization  
 5 between Mo<sub>2</sub>C and FeNi<sub>3</sub>.

6

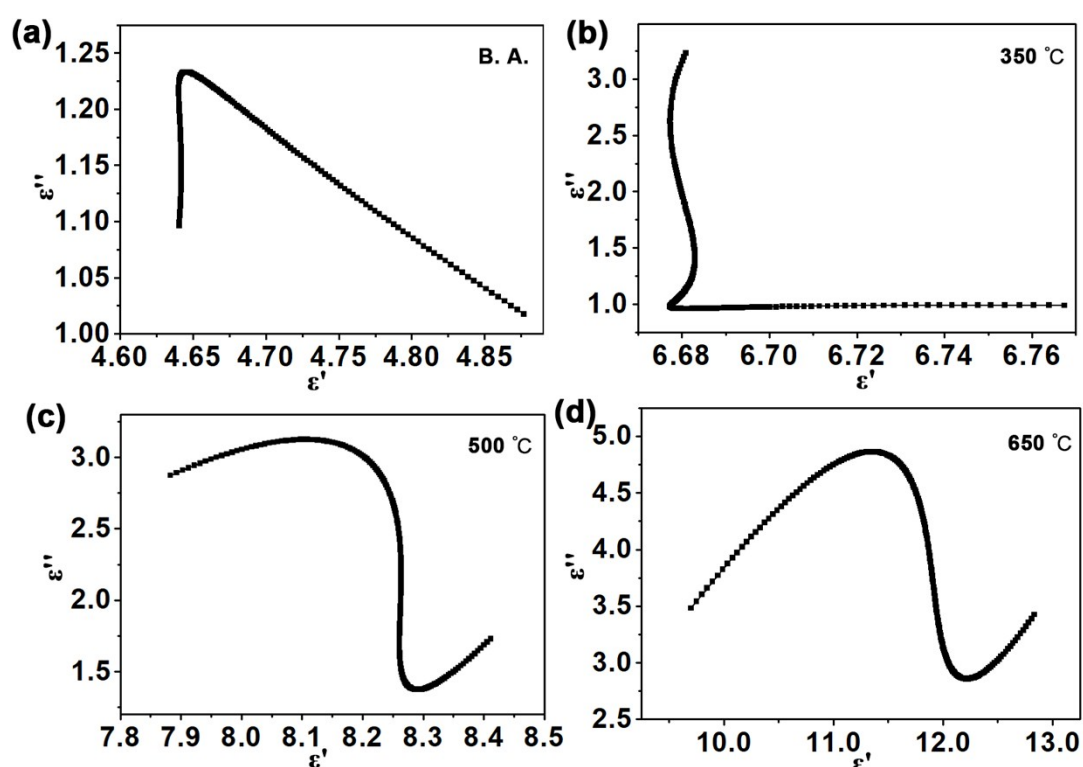

7

8 **Fig. S9** Cole-cole curves of the absorbing papers containing the FeNi<sub>3</sub>@Mo<sub>2</sub>C (a) before and after  
 9 annealing at (b) 350 °C, (c) 500 °C and (d) 650 °C.

10

11 Figure S10 illustrates that not only strong attenuation of the EM wave is important to achieve strong  
 12 absorption, impedance matching also need to be considered. Although the attenuation factor of the  
 13 flexible paper containing the FeNi<sub>3</sub>@Mo<sub>2</sub>C annealed at 650 °C exceed that of the sample annealed at  
 14 500 °C (Fig.S10b), more enhanced RL is achieved for the latter (Fig.S10a) which can be attributed to

1 better impedance matching (Fig.S10c & S10d).

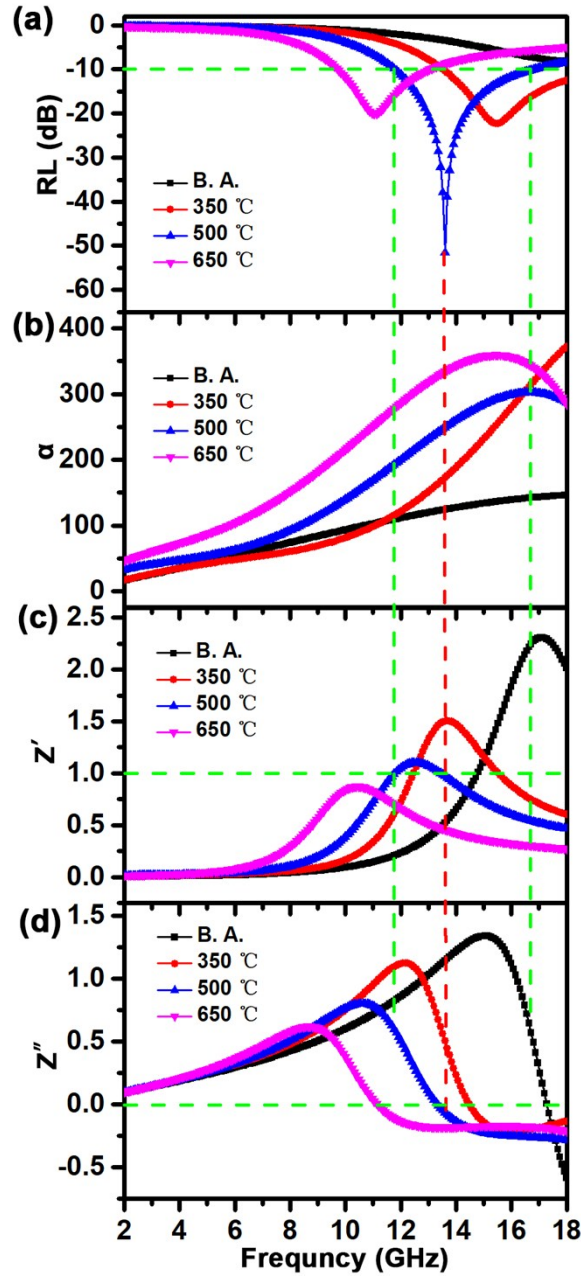

2  
3 **Fig.S10** Comparisons of the (a) RL, (b) attenuation coefficient  $\alpha$ , (c) real and (d) imaginary part of  
4 the impedance between the flexible papers containing the FeNi<sub>3</sub>/Mo<sub>2</sub>C before and after annealing at  
5 various temperatures.

6  
7 Figure S11 compares the electromagnetic parameters of the absorbing paper with FeNi<sub>3</sub>/Mo<sub>2</sub>C  
8 annealed at 500 °C obtained by the coaxial and waveguide methods. The  $\epsilon'$ ,  $\epsilon''$ ,  $\mu'$  and  $\mu''$  measured by

1 both methods exhibit similar value and trend compared with each other.

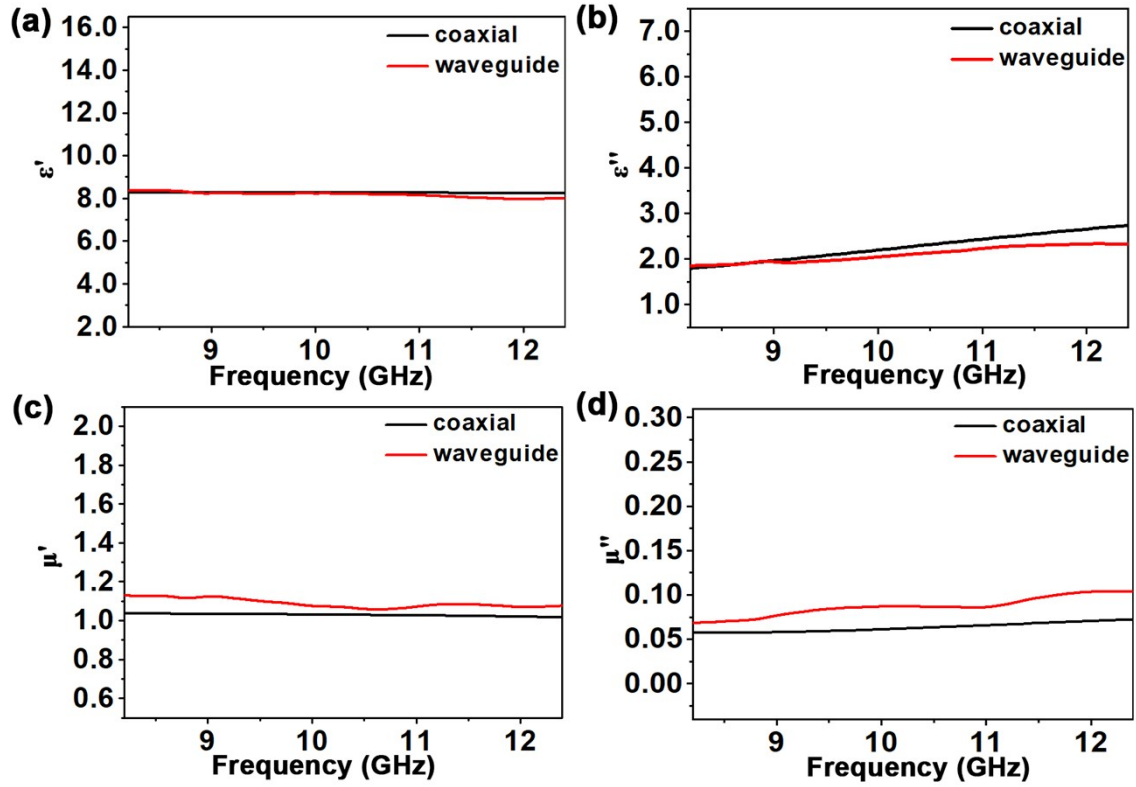

2  
3 **Fig.S11** The (a)  $\epsilon'$ , (b)  $\epsilon''$ , (c)  $\mu'$  and (d)  $\mu''$  measured by the coaxial and waveguide methods.

4  
5 Table S1 compares the absorption performance of the FeNi<sub>3</sub>/Mo<sub>2</sub>C paper with other related materials  
6 reported recently. The FeNi<sub>3</sub>/Mo<sub>2</sub>C paper exhibit relatively wide EAB (5.10 GHz) and enhanced RL  
7 (-51.50 dB).

| Material systems       | EAB   | RL <sub>min</sub> (dB) | Thickness(mm) | Filler ratio | Ref. |
|------------------------|-------|------------------------|---------------|--------------|------|
|                        | (GHz) |                        |               | (wt%)        |      |
| Mo <sub>2</sub> C      | 3.20  | -49.19                 | 2.60          | 20 %         | 2    |
| Ni/Mo <sub>2</sub> C-C | 3.50  | -55.90                 | 2.70          | 15 %         | 3    |

|                                      |      |        |      |      |           |
|--------------------------------------|------|--------|------|------|-----------|
| Ni@SnO <sub>2</sub>                  | 4.80 | -29.70 | 1.70 | 50 % | 4         |
| FeCo/graphite                        | 1.60 | -30.60 | 2.00 | 30%  | 5         |
| FeCo/Al <sub>2</sub> O <sub>3</sub>  | 3.20 | -30.80 | 2.00 | —    | 6         |
| FeNi/C                               | 3.30 | -32.78 | 1.30 | 40 % | 7         |
| FeNi <sub>3</sub> /N-GN              | 3.40 | -57.20 | 1.45 | 50 % | 8         |
| FeNi <sub>3</sub> @C                 | 5.08 | -43.30 | 2.00 | 40 % | 9         |
| FeNi <sub>3</sub> /Mo <sub>2</sub> C | 5.10 | -51.50 | 2.00 | 30 % | This work |

**Table S1** Comparisons of the electromagnetic wave absorption performance between the FeNi<sub>3</sub>/Mo<sub>2</sub>C composites and other related materials

## Reference

1. B. Zhao, B. Fan, Y. Xu, G. Shao, X. Wang, W. Zhao and R. Zhang, *ACS Appl. Mater. Interfaces*, 2015, **7**, 26217-26225.
2. S. Dai, Y. Cheng, B. Quan, X. Liang, W. Liu, Z. Yang, G. Ji and Y. Du, *Nanoscale*, 2018, **10**, 6945-6953.
3. S. Gao, J. Feng, G. Wang and B. Liang, *Front Chem.*, 2019, **7**, 427.
4. B. Zhao, X. Guo, W. Zhao, J. Deng, G. Shao, B. Fan, Z. Bai and R. Zhang, *ACS Appl. Mater. Interfaces*, 2016, **8**, 28917-28925.
5. C. Wang, R. Lv, Z. Huang, F. Kang and J. Gu, *J. Alloys Compd.*, 2011, **509**, 494-498.
6. X. Liu, D. Geng and Z. Zhang, *Appl. Phys. Lett.*, 2012, **100**, 229901.

- 1 7. C. Feng, X. Liu, Y. Sun, C. Jin and Y. Lv, *RSC Adv.*, 2014, **4**, 22710-22715.
- 2 8. J. Feng, Y. Zong, Y. Sun, Y. Zhang, X. Yang, G. Long, Y. Wang, X. H. Li and X. Zheng, *Chem.*  
3 *Eng. J.*, 2018, **345**, 441-451.
- 4 9. Y. Sun, X. Liu, C. Feng, J. C. Fan, Y. Lv, Y. Wang and C. Li, *J. Alloys Compd.*, 2014, **586**, 688-  
5 692.
- 6
